# Supplementary material for: Facile fabrication of thermo/redox responsive hydrogels based on a dual crosslinked matrix for a smart on–off switch
Source: Royal Society of Chemistry journal article supplement (doi:10.1039/c8sm00504d), 2018-01-01
Supplement: c8sm00504d1.pdf [file c8sm00504d1.pdf]

**Electronic Supplementary Information for**

**Facile fabrication of thermo/redox responsive  
hydrogels based on a dual crosslinked matrix for  
smart on-off switch**

*Na Sun, Panpan Sun, Aoli Wu, Xuanxuan Qiao, Fei Lu\* and Liqiang Zheng\**

Key Laboratory of Colloid and Interface Chemistry, Shandong University, Ministry of  
Education, Jinan, 250100, P. R. China.

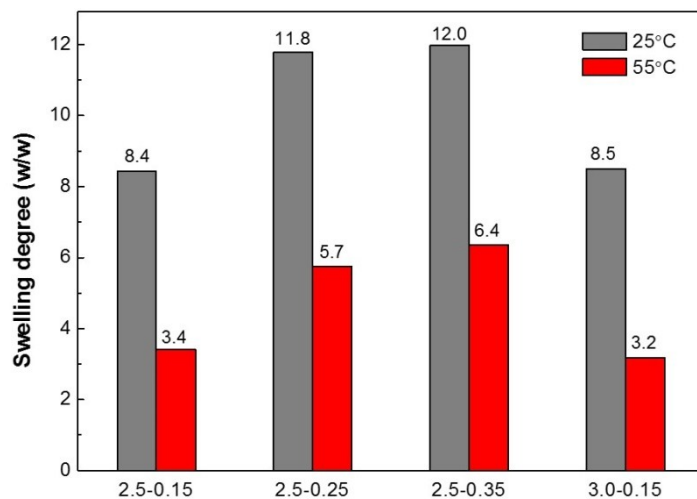

**Fig. S1** Swelling ratios of poly([NIPAM]<sub>x</sub>-co-[VmimCM]<sub>y</sub>) hydrogels.

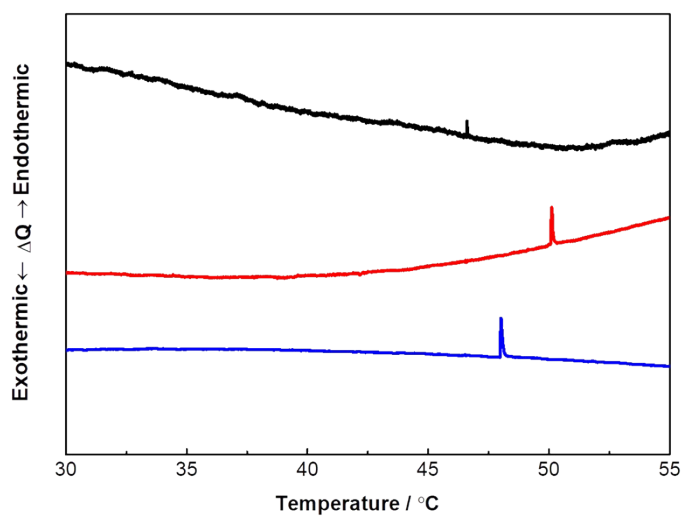

**Fig. S2** DSC curves of poly([NIPAM]<sub>2.5</sub>-co-[VmimCM]<sub>0.15</sub>) hydrogel (black), poly([NIPAM]<sub>2.5</sub>-co-[VmimCM]<sub>0.25</sub>) hydrogel (red) and poly([NIPAM]<sub>3.0</sub>-co-[VmimCM]<sub>0.15</sub>) hydrogel (blue).

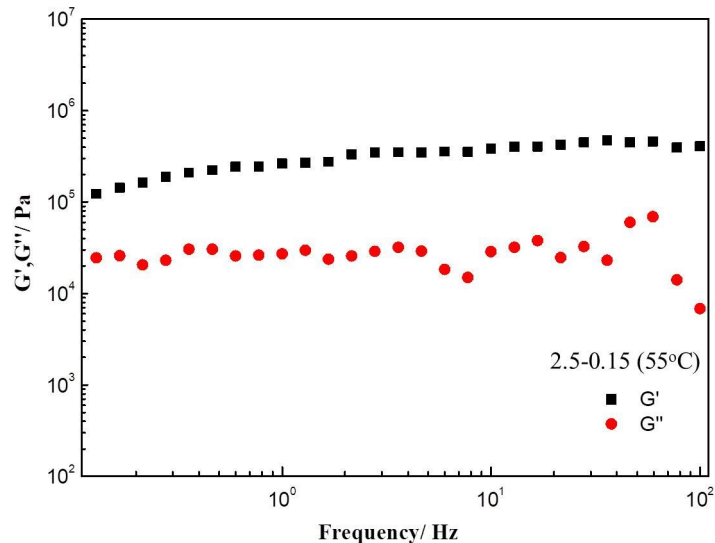

**Fig. S3** The storage modulus ( $G'$ ) and loss modulus ( $G''$ ) of poly([NIPAM]<sub>2.5</sub>-co-[VmimCM]<sub>0.15</sub>) hydrogels at 55°C.

**Table S1** Dynamic rheology of poly([NIPAM]<sub>x</sub>-co-[VmimCM]<sub>y</sub>) hydrogels. The  $G'$ ,  $G''$  values shown in the table are obtained from frequency sweep experiments at  $f=10$  Hz.

| Sample                                  | $G'$ /Pa | $G''$ /Pa | $(G'-G'')$ /Pa<br>(Elasticity) | $G'/G''$<br>(Stiffness) |
|-----------------------------------------|----------|-----------|--------------------------------|-------------------------|
| 2.0-0.15                                | 3554     | 207.2     | 3346.8                         | 17.2                    |
| 2.5-0.15                                | 10250    | 480.4     | 9769.6                         | 21.3                    |
| 2.5-0.35                                | 11640    | 351       | 11289                          | 33.2                    |
| 2.5-0.15<br>(no Fe <sup>3+</sup> added) | 6219     | 319.4     | 5899.6                         | 19.5                    |
| 2.5-0.15<br>(55°C)                      | 382200   | 28590     | 353610                         | 13.4                    |

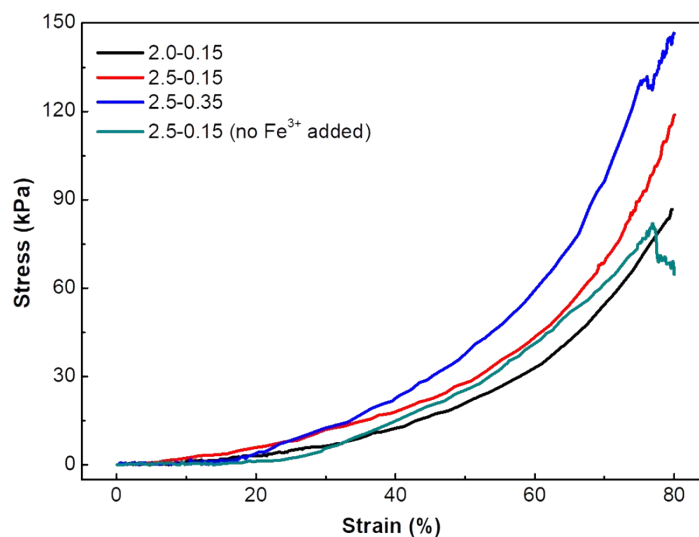

**Fig. S4** Stress-strain curves of compressive tests for poly([NIPAM]<sub>x</sub>-co-[VmimCM]<sub>y</sub>) hydrogels.

**Table S2** Dynamic rheology of oxide and reduced poly([NIPAM]<sub>x</sub>-co-[VmimCM]<sub>y</sub>) hydrogels.

The  $G'$ ,  $G''$  values shown in the table are obtained from frequency sweep experiments at  $f=10$  Hz.

| Samples                       | $G'/\text{Pa}$ | $G''/\text{Pa}$ | $G'-G''/\text{Pa}$<br>(Elasticity) | $G'/G''$<br>(Stiffness) |
|-------------------------------|----------------|-----------------|------------------------------------|-------------------------|
| 2.0-0.25                      | 3886           | 212.1           | 3673.9                             | 18.32                   |
| 2.0-0.25<br>(after reduction) | 3394           | 359.6           | 3034.4                             | 9.44                    |

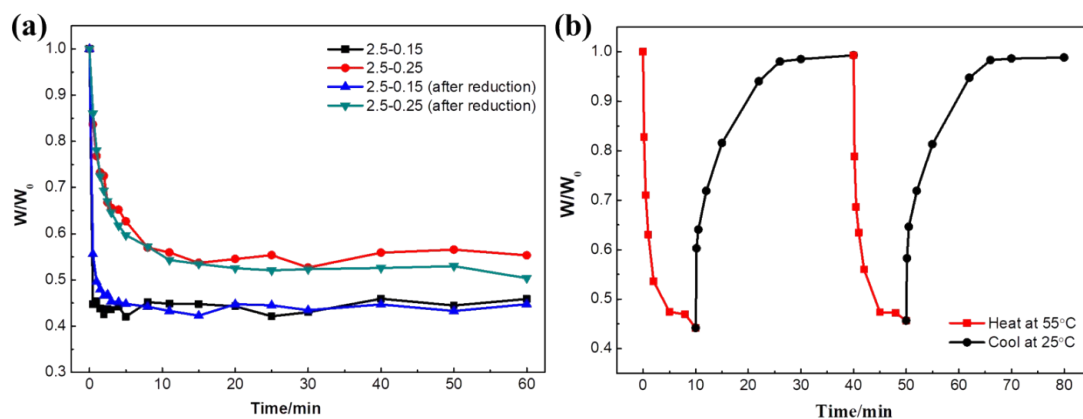

**Fig. S5** (a) Dynamic weight-deswelling behavior of reduced poly([NIPAM]<sub>x</sub>-co-[VmimCM]<sub>y</sub>) hydrogels after the environmental temperature jumping abruptly from 25 °C to 55 °C; (b) the reversible swelling/deswelling behavior of the reduced poly([NIPAM]<sub>2.5</sub>-co-[VmimCM]<sub>0.15</sub>) hydrogel.

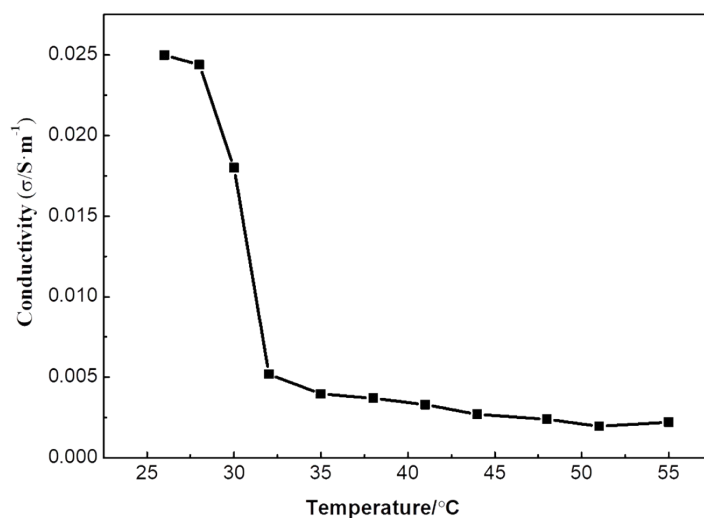

**Fig. S6** The temperature-dependent conducting property for the reduced poly([NIPAM]<sub>2.5</sub>-co-[VmimCM]<sub>0.15</sub>) hydrogel.
